# Supplementary material for: Expression and Function of Connexin 43 in Human Gingival Wound Healing and Fibroblasts
Source: PLoS One. 2015 Jan 13;10(1):e0115524. doi: 10.1371/journal.pone.0115524 (PMC4293150; doi:10.1371/journal.pone.0115524)
Supplement: S2 Table — (DOCX) [file pone.0115524.s011.docx]

**Table S2. Primers used for real-time PCR.**

| **GeneBank** | **Gene** | **Primer sequence** | **Orientation** | **Location** | **Amplicon (bp)** |
| --- | --- | --- | --- | --- | --- |
| **MMPs and TIMPs** | | | | | |
| NM_002421 | MMP-1 | GCTAACAAATACTGGAGGTATGATG | Forward | 1250-1275 | 100 |
| GTCATGTGCTATCATTTTGGGA | Reverse | 1304-1325 |
| NM_001127891 | MMP-2 | AGACATACATCTTTGCTGGAG | Forward | 1900-1920 | 88 |
| ATCTGCGATGAGCTTGG | Reverse | 1988-1972 |
| NM_001166308 | MMP-3 | ATGATGAACAATGGACAAAGGA | Forward | 661-682 | 91 |
| GAGTGAAAGAGACCCAGGGA | Reverse | 751-732 |
| NM_214207 | MMP-7 | TATGCTGCAACTCATGAAC | Forward | 722-740 | 82 |
| CGTAGGTTGGATACATCAC | Reverse | 804-785 |
| NM_004994 | MMP-9 | CACTACTGTGCCTTTGAGTCC | Forward | 1531-1551 | 62 |
| CGATGGCGTCGAAGATGTT | Reverse | 1592-1574 |
| NM_002425 | MMP-10 | TTATACACCAGATTTGCCAAGA | Forward | 394-415 | 56 |
| TTCAGAGCTTTCTCAATGG | Reverse | 450-432 |
| NM_005940 | MMP-11 | CTATCCTCCAAAGCCATTGTAA | Forward | 2258-2179 | 106 |
| CAACTGTGTTTAATGACAATCCTC | Reverse | 2254-2231 |
| NM_002426 | MMP-12 | GTATGATGAAAGGAGACAGATGAT | Forward | 1303-1326 | 166 |
| TACGTTGGAGTAGGAAGTCAT | Reverse | 1469-1449 |
| NM_002427 | MMP-13 | CAGGAATTGGTGATAAAGTAGAT | Forward | 1302-1324 | 85 |
| CTGTATTCAAACTGTATGGGTC | Reverse | 1365-1386 |
| NM_004995 | MMP-14 | TCTCCCAGAGGGTCATTCAT | Forward | 618-1637 | 70 |
| TTCCAGTATTTGTTCCCCTTGTAG | Reverse | 1688-1665 |
| NM_002429 | MMP-19 | CCTGTCACAATATGGGTACCTAC | Forward | 232-254 | 72 |
| CTCGGTGATATCTTCTGGCTT | Reverse | 304-284 |
| NM_003254 | TIMP-1 | CTGTGTCCCACCCCACC | Forward | 267-283 | 64 |
| GAACTTGGCCCTGATGACGA | Reverse | 330-311 |
| NM_003255 | TIMP-2 | ACATTTATGGCAACCCTATCAA | Forward | 481-502 | 70 |
| TCAGGCCCTTTGAACATCTTTA | Reverse | 550-529 |
| NM_000362 | TIMP-3 | AGGACGCCTTCTGCAAC | Forward | 1281-1297 | 68 |
| CTCCTTTACCAGCTTCTTCC | Reverse | 1348-1329 |
| NM_003256 | TIMP-4 | ACCTGTCCTTGGTGCAGA | Forward | 927-944 | 80 |
| TGTAGCAGGTGGTGATTTGG | Reverse | 1004-985 |
| **Molecules involved in intracellular ECM degradation** | | | | | |
| NM_000396 | CTSK (Cathepsin K) | TCGACTATCGAAAGAAAGGATA | Forward | 585-606 | 70 |
| AAAGCCCAACAGGAACCA | Reverse | 655-637 |
| AF134838 | Endo180 (CD280) | AAGAGGCCCAGCTGGTCA | Forward | 3144-3161 | 100 |
| GCATGGAGGCCAATCCAAAG | Reverse | 3243-3224 |
| **Fibrillar ECM proteins** | | | | | |
| BC036531 | Collagen type I (alpha 1) | AACCAAGGCTGCAACCTGGA | Forward | 3951-3970 | 80 |
| GGCTGAGTAGGGTACACGCAGG | Reverse | 4030-4009 |
| NM_000090 | Collagen type III (alpha 1) | CTCCTGGGATTAATGGTAGT | Forward | 1271-1290 | 70 |
| CCAGGAGCTCCAGGAAT | Reverse | 1340-1324 |
| NM_212482 | EDA-FN (Extra domain A-Fibronectin) | CACAGTCAGTGTGGTTGCCT | Forward | 5633-5652 | 68 |
| CTGTGGACTGGGTTCCAATCA | Reverse | 5700-5680 |
| NM_212482 | EDB-FN (Extra Domain B-Fibronectin) | CAGTAGTTGCGGCAGGAGAA | Forward | 4168-4188 | 65 |
| GTATCCTACTGAGGAGTCCACAAAATC | Reverse | 4232-4206 |
| **Matricellular proteins** | | | | | |
| NM_002160 | TN-C (Tenascin-C) | CAACCTGATGGGGAGATATGGGGA | Forward | 6769-6792 | 75 |
| GAGTGTTCGTGGCCCTTCCAG | Reverse | 6846-6826 |
| NM_001901 | CTGF (CCN2) | ATGATGTTCATCAAGACCTGTGCCTG | Forward | 199-183 | 80 |
| CTTCCTGTAGTACAGGGATTCAAAGATGTC | Reverse | 199-184 |
| **Small leucine-rich proteoglycans** | | | | | |
| NM_001711 | BGN (Biglycan) | CTCAAGCTCCTCCAGGTGGTC | Forward | 1067-1087 | 93 |
| CCGAAGCCCATGGGACAGAAGTC | Reverse | 1151-1127 |
| BT019800 | DCN (Decorin) | CTGACACAACTCTGCTAGAC | Forward | 242-261 | 97 |
| GACAAGAATCAATGCGTGAAG | Reverse | 339-319 |
| NM_002023 | FMOD (Fibromodulin) | CACAATGAGATCCAGGAAG | Forward | 761-779 | 85 |
| TCCGAAGGTGGTTATAACTC | Reverse | 845-826 |
| BT006707 | LUM (Lumican) | TAGACAACAATAAGATCAGCAACA | Forward | 635-658 | 85 |
| TTCGTTGTGAGATAAACGCAG | Reverse | 720-700 |
| **Contractility and myofibroblast-associated proteins** | | | | | |
| NM_001613 | α-SMA (α-Smooth Muscle Actin) | AGCGTGGCTATTCCTTCGT | Forward | 637-655 | 97 |
| CTCATTTTCAAAGTCCAGAGCTACA | Reverse | 733-707 |
| NM_001142483 | P311 | CCTGGACTGAAGAGAGG | Forward | 321-447 | 78 |
| CAGACAAAGAGTTCTGGGTA | Reverse | 508-489 |
| NM_001004439 | α11 integrin | GAAGGCACCAACAAGAACGA | Forward | 1144-1163 | 60 |
| AGGAAAAGCCCGTCTGTGA | Reverse | 1204-1186 |
| NM_002473 | NMMIIA (Non-Muscle Myosin IIA) | ACCGAGAAGATCAATCCATC | Forward | 722-741 | 81 |
| AGATACTGGATGACCTTCTTG | Reverse | 803-783 |
| NM_005964 | NMMIIB (Non-Muscle Myosin IIB) | CCGTTTTACATAATCTGAAGGATC | Forward | 395-418 | 98 |
| TTGGAAGATTCTTGTAAGGGTT | Reverse | 493-472 |
| **TGF-β Signaling related genes** | | | | | |
| NM_000660 | TGF-β1 | CAACGAAATCTATGACAAGTTCAAGCAG | Forward | 1218-1245 | 76 |
| CTTCTCGGAGCTCTGATGTG | Reverse | 1294-1275 |
| NM_003238 | TGF-β2 | TGGTGAAAGCAGAGTTCAGAG | Forward | 1883-1903 | 140 |
| CACAACTTTGCTGTCGATGTAG | Reverse | 2022-2001 |
| NM_003239 | TGF-β3 | ACACCAATTACTGCTTCCGCAA | Forward | 1161-1182 | 81 |
| GCCTAGATCCTGTCGGAAGTC | Reverse | 1242-1220 |
| NM_001130916 | TGF-βR1 (TGF-β Receptor 1) | GTGTATAGCTGAAATTGACTTAA | Forward | 286-308 | 99 |
| TGATTGCAGCAATATGTTGTA | Reverse | 384-364 |
| NM_003242 | TGF-βR2 (TGF-β Receptor 2) | CTGGTGAGACTTTCTTCATGTG | Forward | 768-789 | 127 |
| CTGATGCCTGTCACTTGAAA | Reverse | 894-875 |
| NM_001964 | EGR1 (Early Growth Response 1) | ACGTCTTGGTGCCTTTTGTG | Forward | 2663-2682 | 75 |
| GAGGTGAGCATGTCCCTCA | Reverse | 2737-2719 |
| NM_001136179 | EGR2 (Early Growth Response 2) | AGCTTTGCTCCCGTCTCTG | Forward | 469-487 | 88 |
| AGCTGGCACCAGGGTACT | Reverse | 556-539 |
| NM_004430 | EGR3 (Early Growth Response 3) | CGTTGGACAGCAATCTCTTC | Forward | 903-922 | 74 |
| AATGGAGCCCATGTCGTTG | Reverse | 976-958 |
| NM_005966 | NAB1 (NGFI-A Binding Protein-1) | CAAAGTCCCACTCATCAGAGA | Forward | 1930-1950 | 114 |
| TCACAGCTATCTTGAATCTTCAG | Reverse | 2043-2020 |
| NM_005967 | NAB2 (NGFI-A Binding Protein-2) | CACATCCCTGCTAAAGCTGAA | Forward | 1170-1190 | 111 |
| ATGATGCTGTATTTGCGGATCT | Reverse | 1280-1259 |
| **Growth factors and cytokines** | | | | | |
| NM_001171630 | VEGF-A Vascular Endothelial Growth Factor-A) | AGTGTGTGCCCACTGAGGA | Forward | 1316-1334 | 97 |
| GTGCTGTAGGAAGCTCATCTC | Reverse | 1413-1393 |
| NM_002006 | FGF-2 (Fibroblast Growth Factor-2) | AGTTGGTATGTGGCACTGAA | Forward | 831-850 | 75 |
| GTATAGCTTTCTGCCCAGGTC | Reverse | 886-906 |
| NM_199168 | CXCL12/SDF-1α | TACAGATGCCCATGCCGA | Forward | 174-191 | 93 |
| CTGAAGGGCACAGTTTGGAG | Reverse | 266-247 |
| NM_000576 | IL1βInterleukin-1 beta) | CAGTGAAATGATGGCTTATT | Forward | 111-130 | 75 |
| CTTCATCTGTTTAGGGCCA | Reverse | 186-168 |
| NM_000572 | IL10Interleukin-10) | AGAACCTGAAGACCCTCAG | Forward | 400-418 | 103 |
| CTTATTAAAGGCATTCTTCACCT | Reverse | 503-481 |
| NM_000594 | TNF-α (Tumor Necrosis Factor-α) | TCCCCAGGGACCTCTCTCTAATC | Forward | 357-379 | 92 |
| CTACAACATGGGCTACAGGCTTG | Reverse | 449-427 |
| **Cell-cell junction proteins** | | | | | |
| NM_000166 | Cx32 | TCATCTTCATCTTCAGAATCATGG | Forward | 226-249 | 85 |
| GTGTTGCAGATGAAGGAAGA | Reverse | 310-291 |
| NM_181703 | Cx40 | GAATGTCTTCATTGTCTTTATGCTG | Forward | 753-777 | 105 |
| ACAAATCGCTGTCTGATCTTC | Reverse | 857-837 |
| NM_000165 | Cx43 | AGCAGTCTGCCTTTCGTTGTA | Forward | 393-412 | 73 |
| GATTGGGAAAGACTTGTCATAGCAG | Reverse | 466-442 |
| NM_001097519 | Cx45 | AGCTGGGTCCAACAAAAGC | Forward | 1151-1169 | 108 |
| ACCATAAACTATGAGAAGCACAGATT | Reverse | 1258-1233 |
| NM_001792 | Cadherin-2 | TGAGGAGTCAGTGAAGGAG | Forward | 843-861 | 91 |
| CTTCTGCCTTTGTAGGTGG | Reverse | 933-915 |
| NM_001797 | Cadherin-11 | TTCCTTCGTGTTGTCATTTGTTG | Forward | 174-196 | 89 |
| CTTCTTCACCCATTGGATACTTG | Reverse | 262-240 |
| **Housekeeping genes** | | | | | |
| NM_002046 | GAPDH Glyceraldehydes-3-phosphate d­dehydrogenase) | CTTTGTCAAGCTCATTTCCTGGTA | Forward | 1020-1043 | 70 |
| GGCCATGAGGTCCACCA | Reverse | 1089-1073 |
| M31642 | HPRT1 Hypoxanthine phosphoribosyltransferase I) | TGTTGGATTTGAAATTCCAGACAAG | Forward | 619-643 | 107 |
| CTTTTCCAGTTTCACTAATGACACAA | Reverse | 727-700 |
| NM_021009 | UBC (Ubiquitin C) | GTGGCACAGCTAGTTCCGT | Forward | 371-389 | 96 |
| CTTCACGAAGATCTGCATTGTCA | Reverse | 444-467 |
| NM_004048 | B2M (Beta-2-microglobulin) | TGTCTTTCAGCAAGGACTGGTCTTTC | Forward | 281-306 | 92 |
| ATGGTTCACACGGCAGGCATA | Reverse | 351-372 |
| NM_001172085 | TBP (TATAA-box binding protein) | TTCGGAGAGTTCTGGGATTG | Forward | 542-562 | 94 |
| ACGAAGTGCAATGGTCTTTAG | Reverse | 635-614 |
